# Supplementary material for: Dop1 enhances conspecific olfactory attraction by inhibiting miR-9a maturation in locusts
Source: PubMed Central journal article supplement (PMC5864846; doi:10.1038/s41467-018-03437-z), 2018-03-22
Supplement: 41467_2018_3437_MOESM1_ESM.pdf [file 41467_2018_3437_MOESM1_ESM.pdf]

## **Supplementary Information**

**Dop1 enhances conspecific olfactory preference by inhibiting miR-9a maturation  
in locusts**

Guo et al.

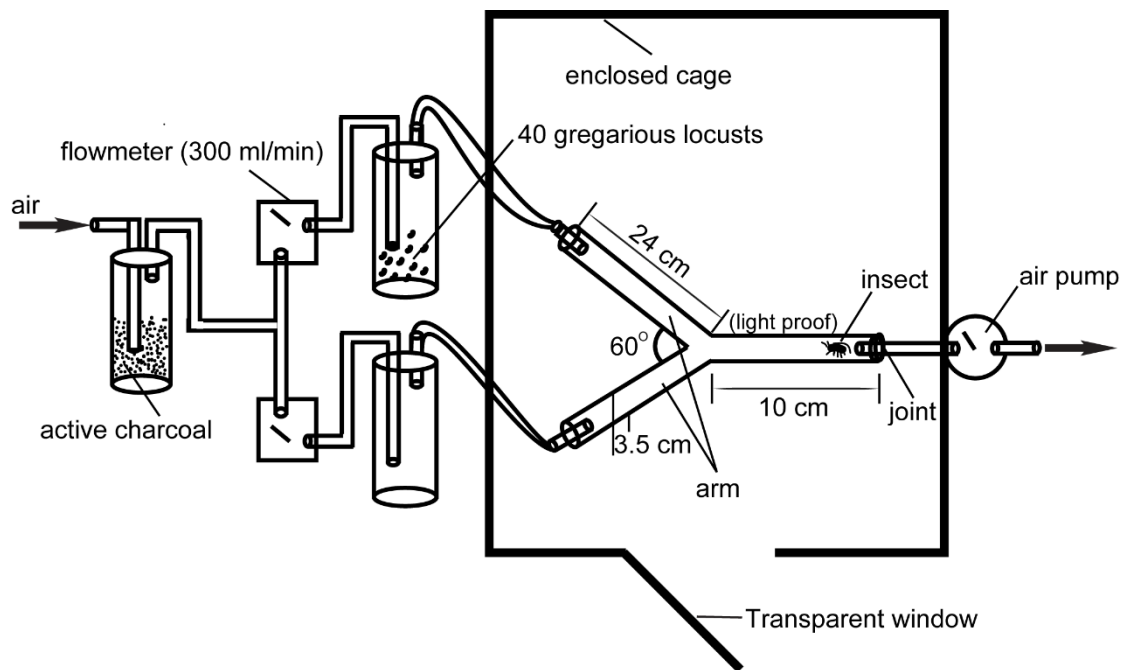

**Supplementary Figure 1. The diagram of the Y-maze as used for testing olfactory preferences of the locusts in the present study.**

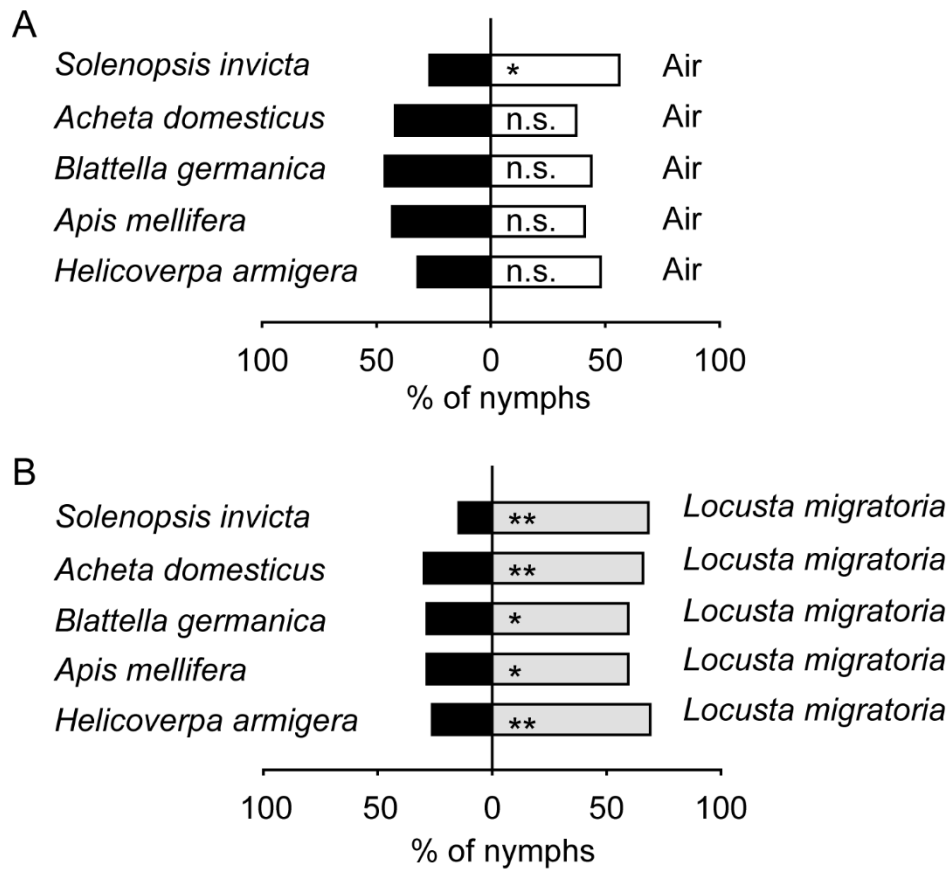

**Supplementary Figure 2. The gregarious locusts are specifically attracted to the conspecific gregarious volatiles.** (A) The olfactory responses of gregarious locusts to air and the volatiles of *Solenopsis invicta* (n = 41), *Acheta domesticus* (n = 49), *Blattella germanica* (n = 41), *Apis mellifera* (n = 44), *Helicoverpa armigera* (n = 50). (B) The olfactory responses of gregarious locusts to gregarious volatiles and the volatiles of *Solenopsis invicta* (n = 41), *Acheta domesticus* (n = 47), *Blattella germanica* (n = 41), *Apis mellifera* (n = 42), *Helicoverpa armigera* (n = 42). The asterisks (\* and \*\*) inside the strip indicate the significant differences of comparing individual numbers in each arm after G-test for goodness-of-fit (\*,  $P < 0.05$ ; \*\*,  $P < 0.01$ ; n.s., not significant).

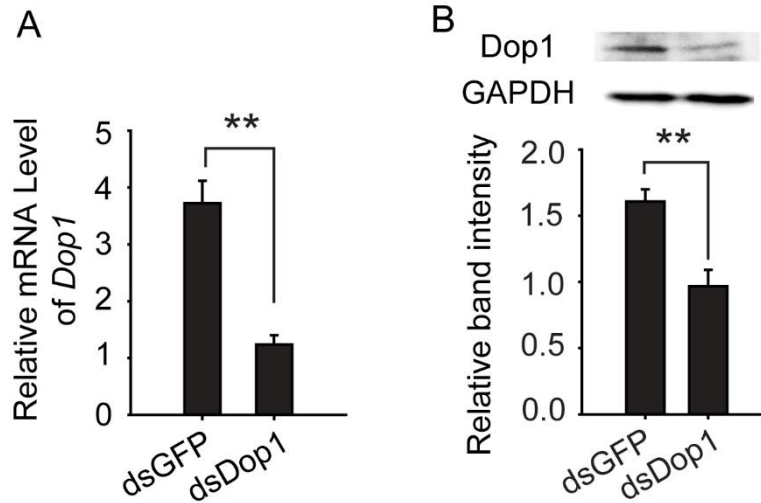

**Supplementary Figure 3. The effects of Dop1 RNAi knockdown in the locust brain.** (A) The mRNA level of *Dop1* after injection of dsDop1 in the locust brain. (B) The protein level of Dop1 after injection of dsDop1 in the locust brain. Injection of dsDop1 induced knockdown of Dop1 was used to validate the antibody specificity, and dsGFP injection was used as the control. The mRNA and protein level of Dop1 are analyzed by Student's *t*-test and presented as the mean  $\pm$  SEM (mRNA, n = 8; protein, n = 6). \*\*,  $P < 0.01$ .

## Flow of bioinformatics analysis for miRNAs

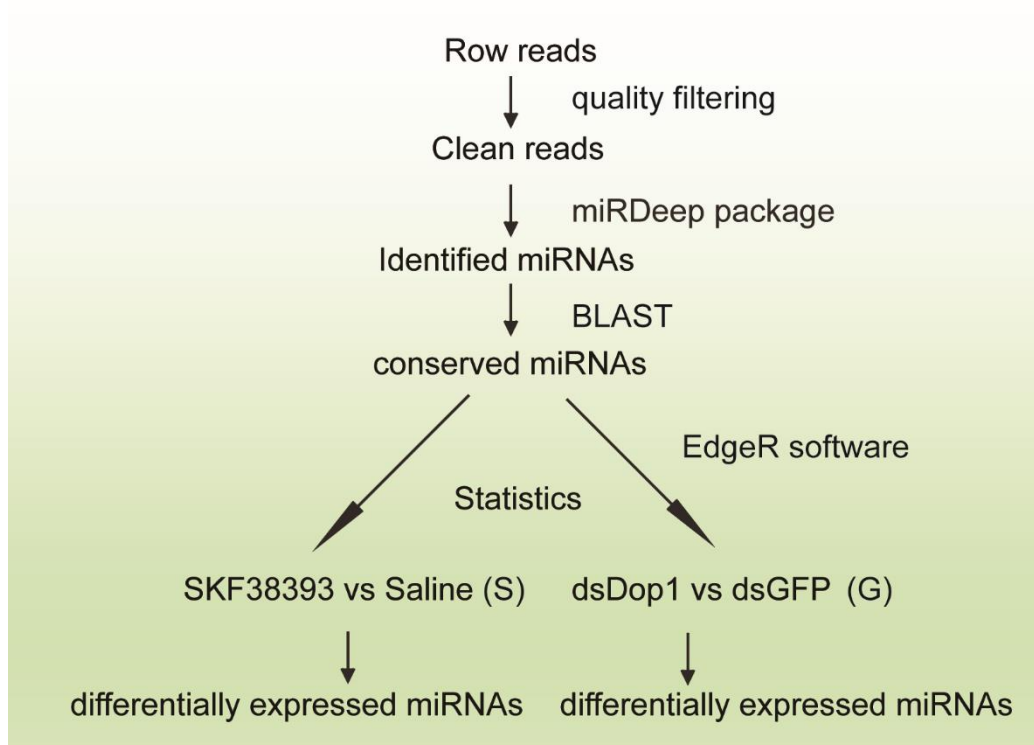

**Supplementary Figure 4. The flow of analysis for differentially expressed miRNAs.** The small RNA transcriptomes were determined by high-throughput sequencing, and the locust miRNAs were identified using *L.migratoria* genome and the miRDeep package. Second, all known arthropod miRNAs deposited in the latest release of miRBase were used to identify the locust miRNA homologs by homology searches. The differentially expressed miRNAs were calculated by EdgeR software. Abbreviations: S, solitary; G, gregarious.

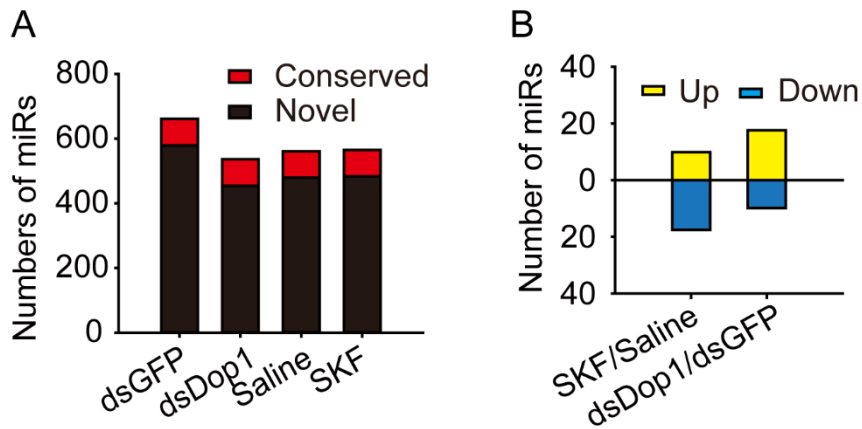

**Supplementary Figure 5. The total miRNAs and differentially expressed miRNAs in different groups.** (A) The numbers of conserved and novel miRNAs identified in the brains with Dop1 activation and inhibition, respectively. The red bars indicate the number of conserved miRNAs, and the black bars indicate the number of novel miRNAs. (B) The numbers of conservative miRNAs expressed differentially after activation and inhibition of Dop1. Abbreviations: SKF, SKF38393.

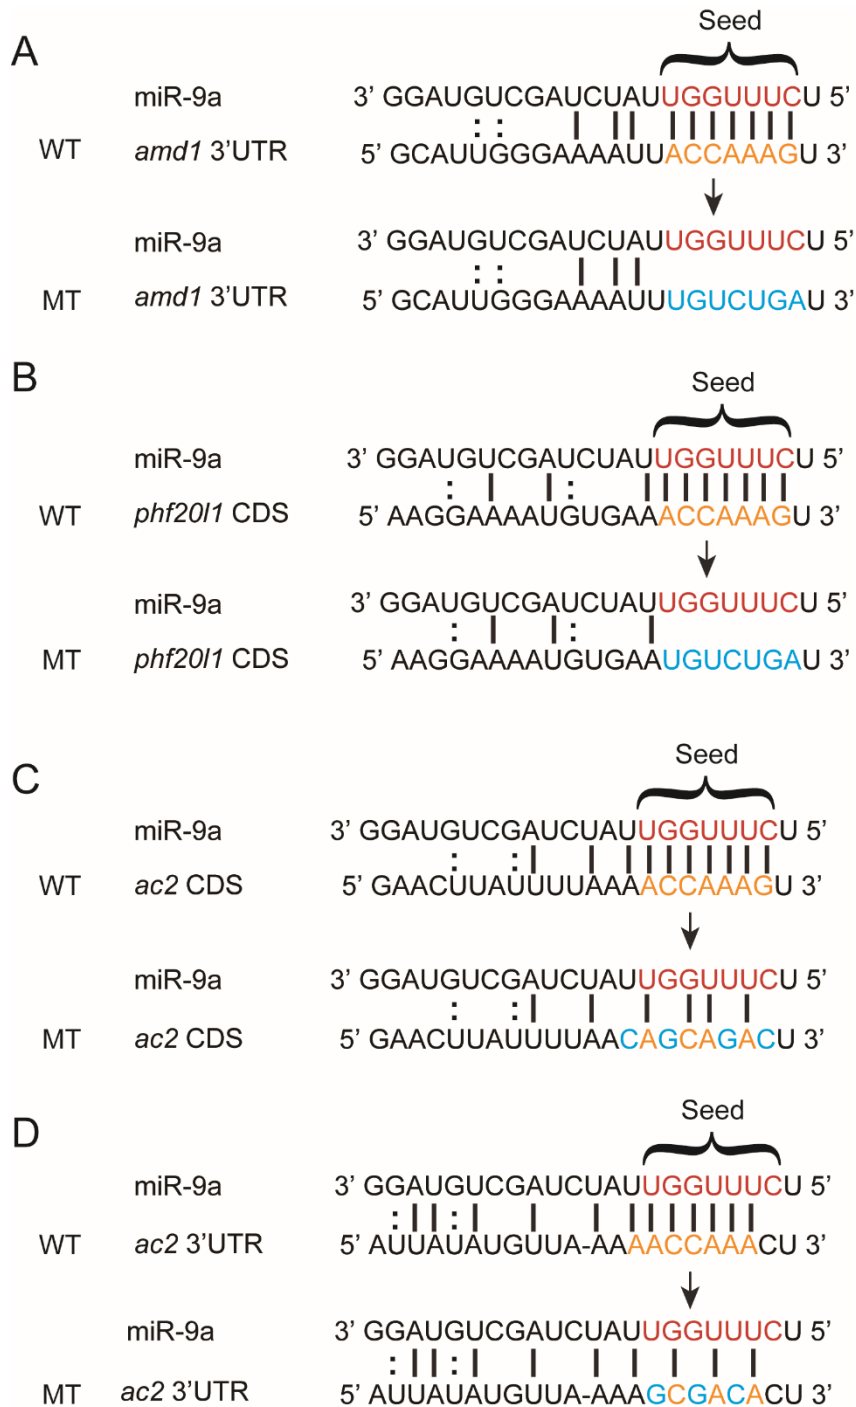

**Supplementary Figure 6. The mutation sites in the putative target genes.** (A) The mutation sites in 3'UTR region of *amd1* gene. (B) The mutation sites in CDS region of *phf2011* gene. (C) The mutation sites in CDS region of *ac2* gene. (D) The mutation sites in 3'-UTR region of *ac2* gene. The point mutations in the putative target sites (WT, orange) were engineered in the region complementary to the miR-9a seed sequence (red). Those point mutations of MT sequences are indicated in blue.

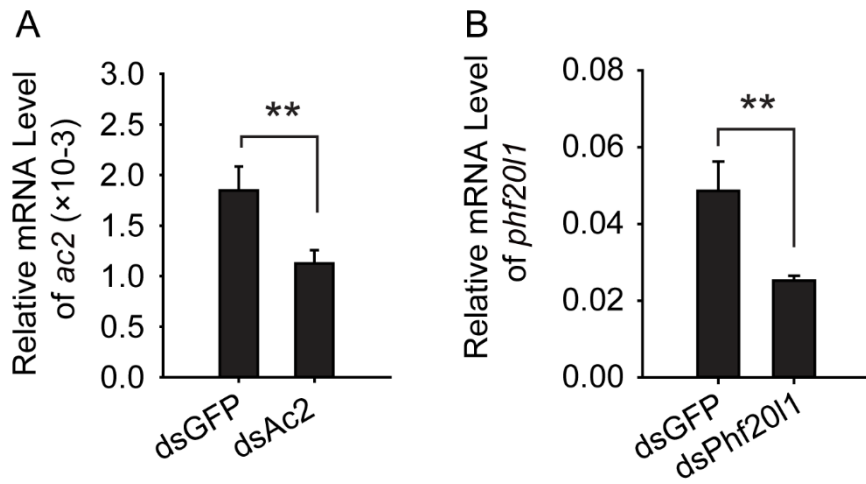

**Supplementary Figure 7. The effects of gene RNAi knockdown in the locust brain.** (A) The mRNA level of *ac2* after injection of dsAc2 in the brain of gregarious locusts. (B) The mRNA level of *phf2011* after injection of dsPhf2011 in the brain of solitary locusts. The mRNA level of *phf2011* and *ac2* are analyzed by Student's *t*-test and presented as the mean  $\pm$  SEM (n = 8). \*\*,  $P < 0.01$ .



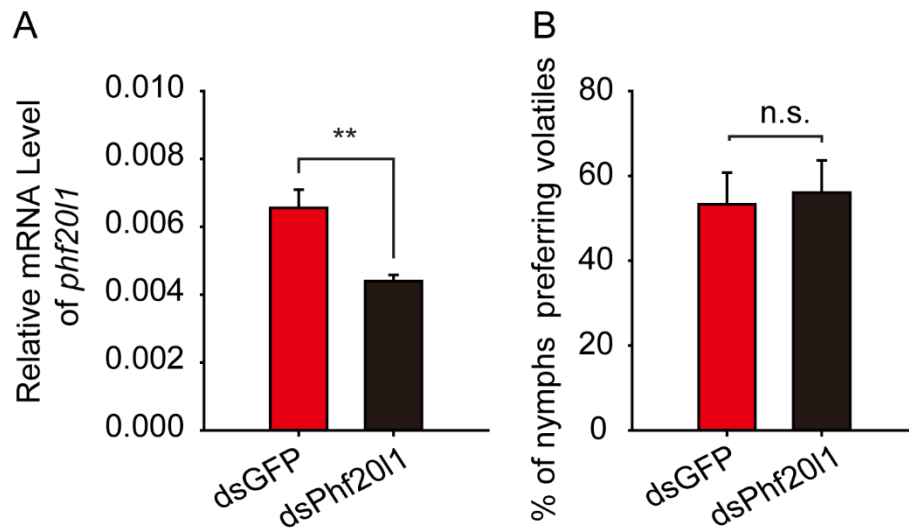

**Supplementary Figure 8. Knockdown of *phf2011* did not change the olfactory preference of the gregarious locusts.** (A) The mRNA level of *phf2011* after injection of dsPhf2011 in the brain of the gregarious locusts. The mRNA level of *phf2011* are presented as the mean  $\pm$  SEM (n = 8). (B) The olfactory responses of the gregarious locusts after *phf2011* RNAi knockdown (n = 45 and 41). The data are shown as proportion ( $p$ )  $\pm$  SE. The asterisks outside the strip indicate the significant difference between controls and the treatments through Student's *t*-test and *G*-test for independence. n.s., not significant; \*\*,  $P < 0.01$ .

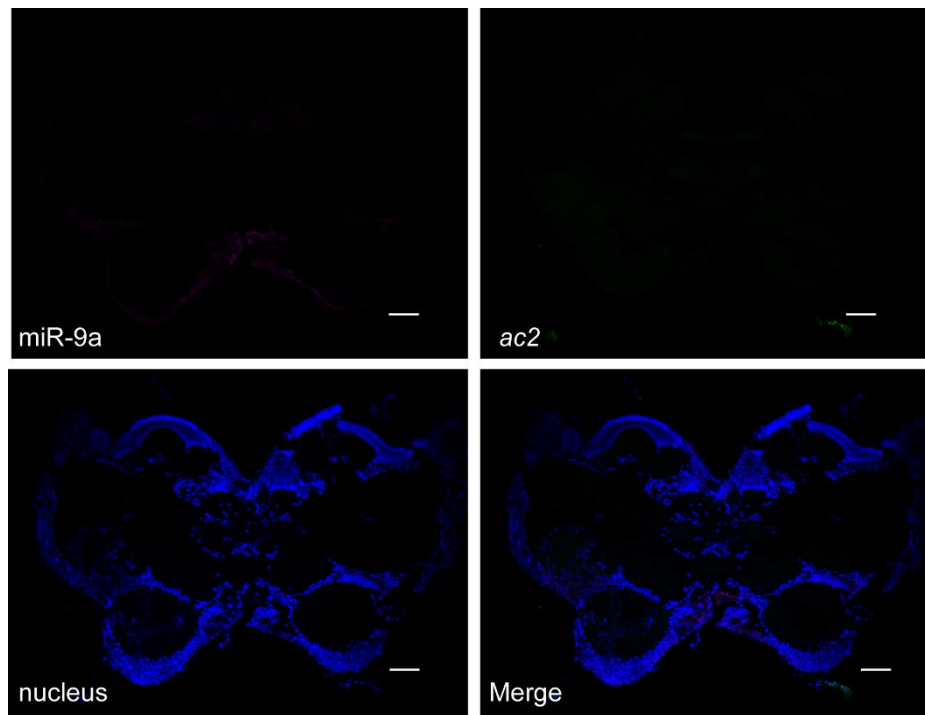

**Supplementary Figure 9. The negative control for co-localization of miR-9a and *ac2* in the locust brain.** The nucleus of locust brain is labeled by Hoechst33342 (Life Technology). The images were visualized using an LSM 710 confocal fluorescence microscope (Zeiss) at magnifications of 10 $\times$ . Scale bar represents 100  $\mu$ m.

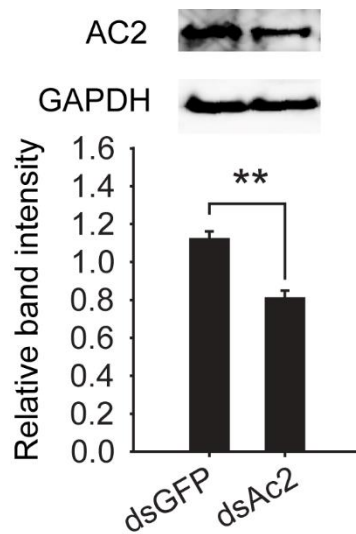

**Supplementary Figure 10. The effects of AC2 RNAi knockdown in the locust brain.** The protein level of AC2 after injection of dsAc2 in the locust brain. Injection of dsAc2 induced knockdown of AC2 was used to validate the antibody specificity, and dsGFP injection was used a control. The protein level of AC2 are analyzed by Student's *t*-test and presented as the mean  $\pm$  SEM (n = 6). \*\*,  $P < 0.01$ .

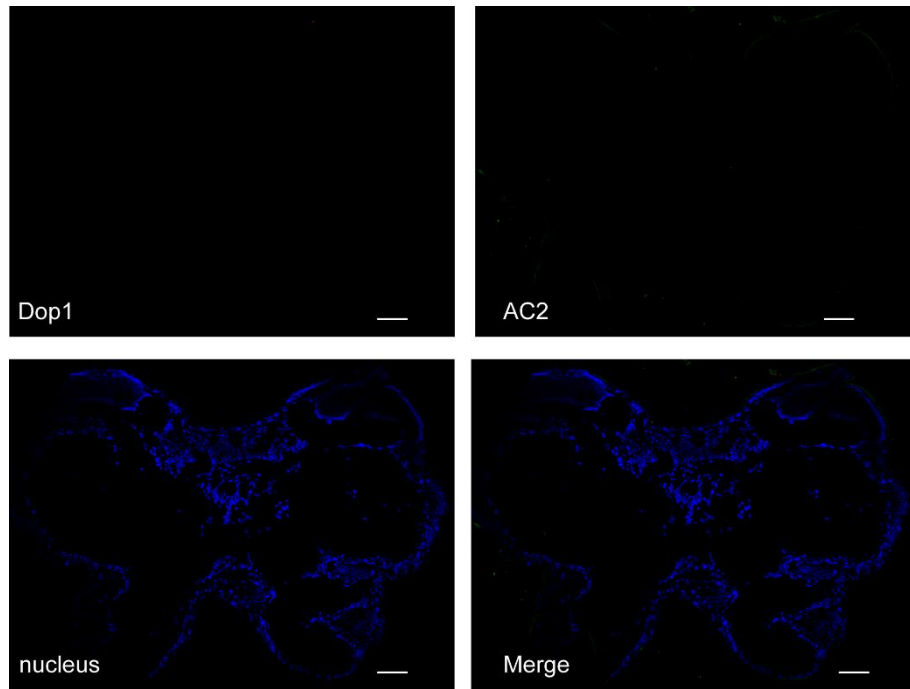

**Supplementary Figure 11. The negative control for co-localization of Dop1 and AC2 in the locust brain.** The nucleus of locust brain is labeled by Hoechst33342 (Life Technology). The images were visualized using an LSM 710 confocal fluorescence microscope (Zeiss) at magnifications of 10 $\times$ . Scale bar represents 100  $\mu$ m.

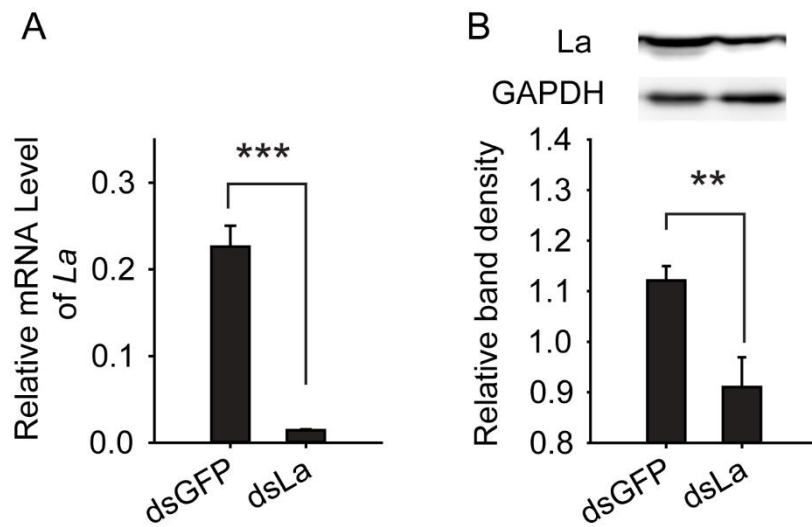

**Supplementary Figure 12. The effects of *La* protein RNAi knockdown in the locust brain.** (A) The mRNA level of *La* after injection of ds*La* in the locust brain. (B) The protein level of *La* protein after injection of ds*La* in the locust brain. Injection of ds*La* induced knockdown of *La* protein was used to validate the antibody specificity, and dsGFP injection was used as a control. The mRNA and protein level of *La* protein are analyzed by Student's *t*-test and presented as the mean  $\pm$  SEM (mRNA,  $n = 8$ ; protein,  $n = 6$ ). \*\*,  $P < 0.01$ ; \*\*\*,  $P < 0.001$ .

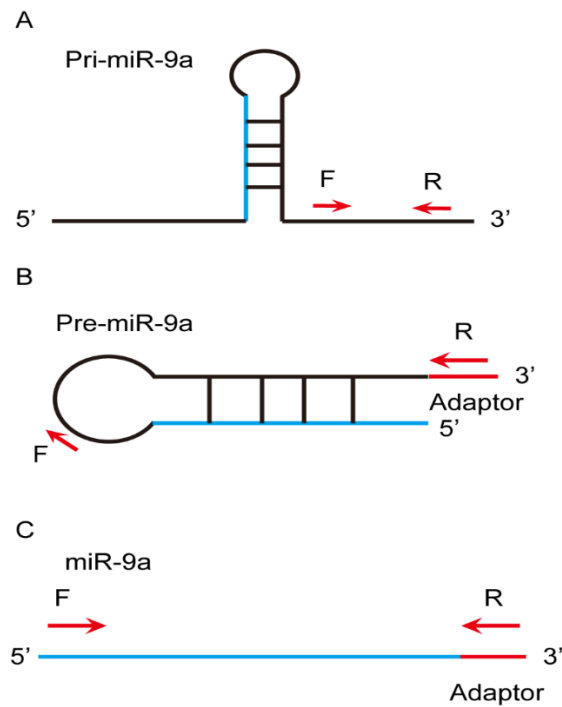

**Supplementary Figure 13. Primer design for selective quantification of pri-miR-9a, pre-miR-9a, and miR-9a.** (A) The specific forward (F) and reverse (R) primers of pri-miR-9a were designed in the part of pri-miR-9a not including pre-miR-9a. (B) The specific forward primer of pre-miR-9a was designed in the loop region, and the reverse primer complementary to the adaptor was provided in the qPCR kit. (C) The specific forward primer of miR-9a was designed according to the sequence of miR-9a, including the seed region, and the reverse primer complementary to the adaptor was provided in the qPCR kit.

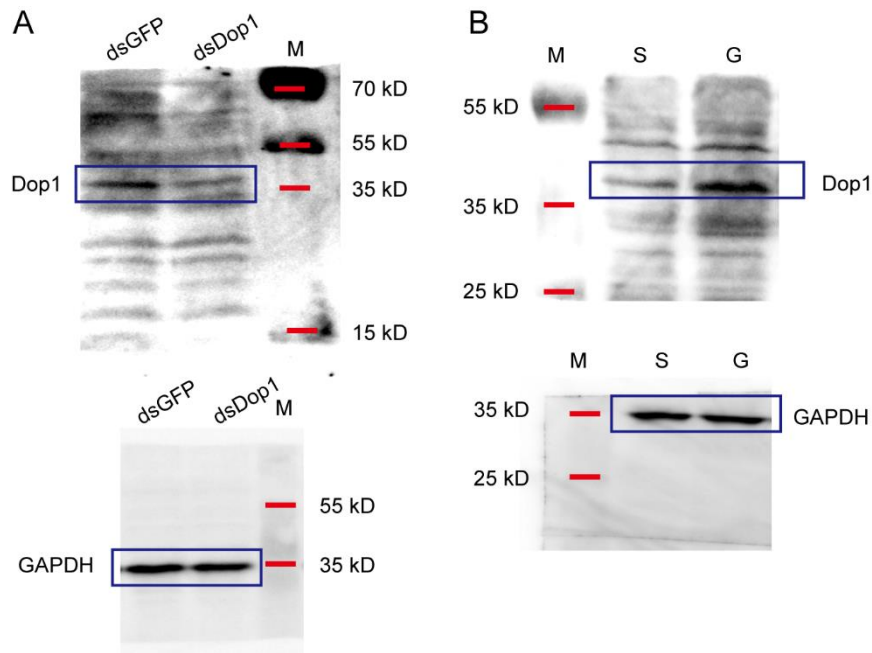

**Supplementary Figure 14. The full-size western blot scans of Dop1.** (A) The full-size western blot scans of Dop1 in the locust brains injected with dsGFP and dsDop1. The bands in the blue frames are cropped and presented in Supplementary Figure 3B. (A) The full-size western blot scans of Dop1 in the brains of solitary and gregarious locusts. The bands in the blue frames are cropped and presented in Figure 1C. Abbreviations: S, solitary; G, gregarious. M, molecular weight ladder (Thermo Fisher, 26619).

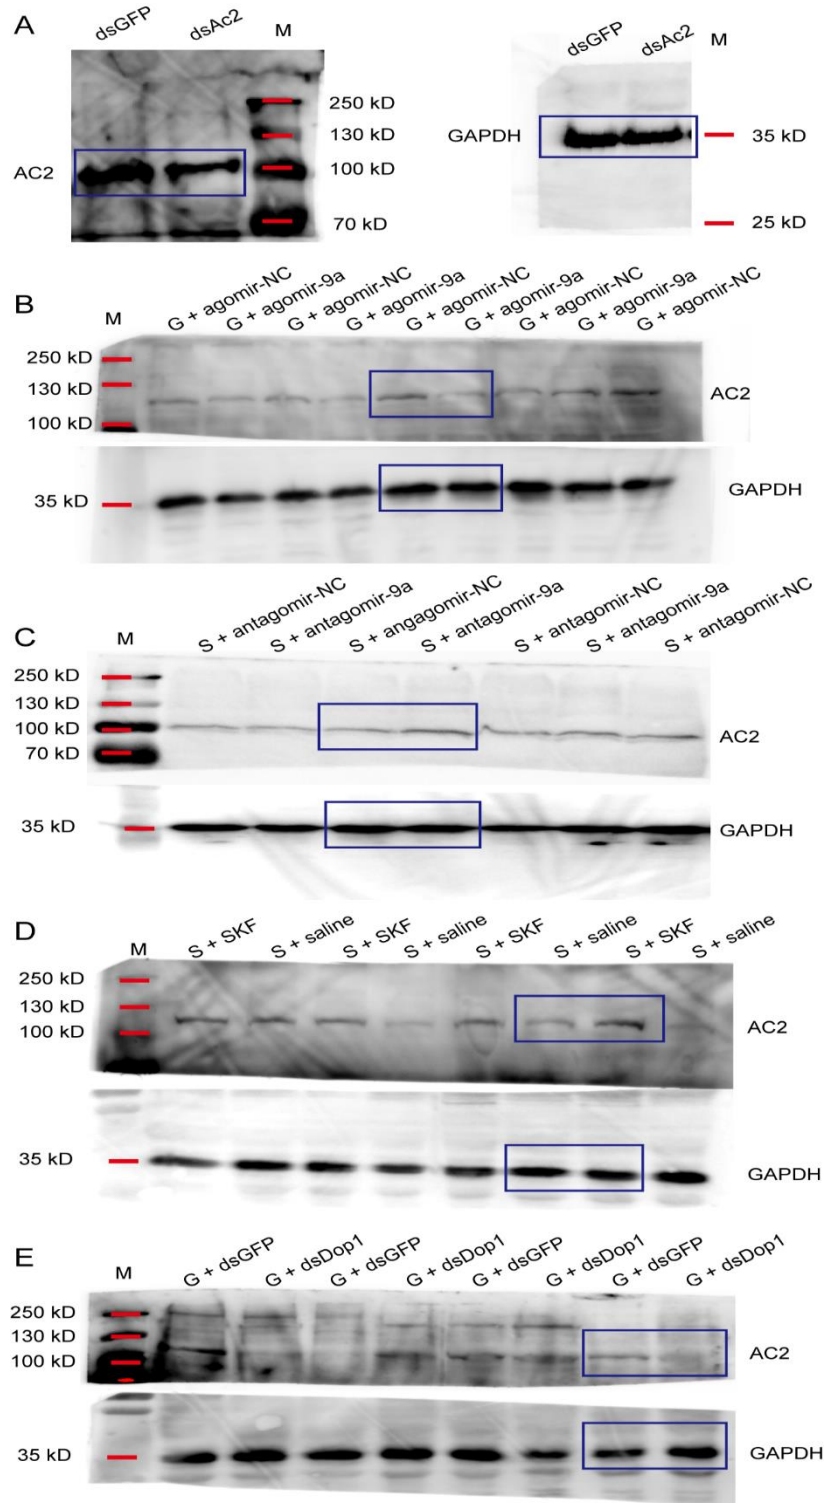

**Supplementary Figure 15. The full-size western blot scans of AC2.** (A) The full-size western blot scans of AC2 in the locust brains injected with dsGFP and dsAc2. The bands in the blue frames are cropped and presented in Supplementary Figure 10. (B and C) The full-size western blot scans of AC2 in the gregarious (B) and solitary (C) brains injected with 9a-agomir and 9a-antagomir, respectively. The bands in the blue frames are cropped and presented in Figures 5D and 5F. (D and E) The full-size western blot scans of AC2 in the solitary (D) and gregarious (E)



brains injected with SKF and dsDop1, respectively. The bands in the blue frames are cropped and presented in Figures 6C and 6D. Abbreviations: S, solitarious; G, gregarious. M, molecular weight ladder (Thermo Fisher, 26619). SKF, SKF38393.

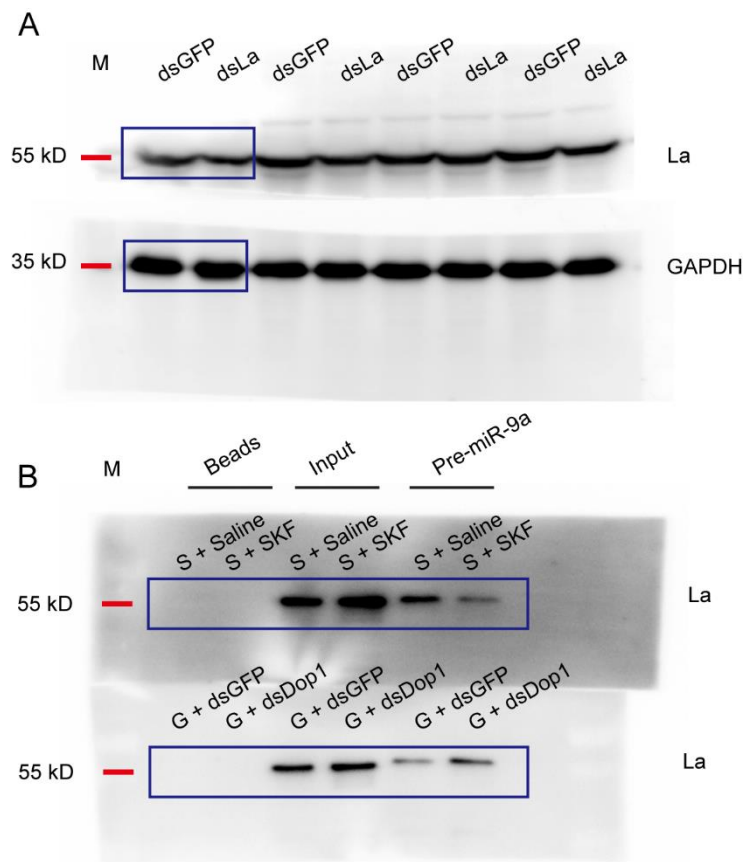

**Supplementary Figure 16. The full-size western blot scans of La protein.** (A) The full-size western blot scans of La in the locust brains injected with dsGFP and dsLa. The bands in the blue frames are cropped and presented in Supplementary Figure 12B. (B) The full-size western blot scans of La in the solitary and gregarious brains injected with SKF and Dop1, respectively. The bands in the blue frames are cropped and presented in Figure 8B. Abbreviations: S, solitary; G, gregarious. M, molecular weight ladder (Thermo Fisher, 26619). SKF, SKF38393.

**Supplementary Table 1. Sequences of chemically synthetic RNA**

---

| Name                      | Sequence                                                                                                      |
|---------------------------|---------------------------------------------------------------------------------------------------------------|
| Labeled<br>Pre-miR-9<br>a | 5'-UUU UUU CUU UGG UUA UCU AGC UGU AUG AGU GCA<br>UGU GAC UGU CAU AAA GCU AGG UUA CCG AAG UUA<br>AG-biotin-3' |

---

**Supplementary Table 2. The pre-miR-9a binding protein candidates identified through RNA pull-down and mass spectrometry**

| Score* | Annotation                       | <i>p</i> value |
|--------|----------------------------------|----------------|
| 165    | La protein-like protein          | 3.16228E-17    |
| 115    | ATP synthase subunit alpha       | 3.16228E-12    |
| 41     | Zinc finger protein 294          | 7.94328E-05    |
| 41     | Carbonic anhydrase               | 7.94328E-05    |
| 40     | RING finger protein 10-like      | 0.0001         |
| 39     | Carboxypeptidase B-like          | 0.000125893    |
| 31     | Synaptic vesicle glycoprotein 2B | 0.000794328    |
| 30     | Tubulin alpha-1 chain            | 0.001          |

\* Score indicates ions score that is  $-10\log(P)$ , where  $P$  is the probability that the observed match is a random event. Individual ions score  $> 36$  indicate identity or extensive homology ( $p < 0.05$ ).

**Supplementary Table 3. Primer sequences for RNAi.**

---

| Genes          | Forward primer (5'-3') | Reverse primer (5'-3') |
|----------------|------------------------|------------------------|
| <i>Dop1</i>    | TCAACGACCTGCTGGGCTA    | AAGGGCACCCAGCAGATGA    |
| <i>phf2011</i> | TTGACGAGAACCTGCCTTATG  | TGGTGATCGAAGACTTCTGACA |
| <i>ac2</i>     | GGATGGCACATCACAGAAAC   | TATTTACAGCATCACCCCAG   |
| <i>La</i>      | GAATGAGGAACGGCGGAAG    | TGATTCCGCTGAAGCCTGTT   |

---

#### Supplementary Table 4. The nucleotide sequences for RNAi

| Genes          | Nucleotide sequences (5'-3')                                                                                                                                                                                                                                                                                                                                                                                                                                                                                                                                                                                                                                                               |
|----------------|--------------------------------------------------------------------------------------------------------------------------------------------------------------------------------------------------------------------------------------------------------------------------------------------------------------------------------------------------------------------------------------------------------------------------------------------------------------------------------------------------------------------------------------------------------------------------------------------------------------------------------------------------------------------------------------------|
| <i>Dop1</i>    | TCAACGACCTGCTGGGCTACTGGATGTTTCGGCGCCCAGTTCTG<br>CGACACCTGGATCGCCTTCGACGTCATGTGCTCCACCGCCTCC<br>ATCCTCAACCTGTGCGCCATCTCGCTCGACAGGTACATCCACA<br>TCAAGGACCCCCTCAGGTACGGGCGGTGGGTGACGCGTCGGG<br>TGGCGGTGGCGAGCATCGCGGCCATCTGGCTGCTGGCGGCGCT<br>CATCTCGTTCCTGCCATCTCGCTGGGGCTGCACCGGCCGCCG<br>CAGCCGCTCACGTACCACGACGGCGCCACCGAGCACCCACGT<br>GCGCGCTCGACCTGACGCCACGTACGCCGTCGTCAGCTCGTG<br>CATCAGCTTCTACTTCCCCACGCTGGTGATGCTGGGCATCTACT<br>GCCGGCTTACCTGTACGCGCAGAAGCACGTCAAGAACATCCG<br>CGCGGTGACGCGGCCGCTGCCCGCCGCCGCCAGCACCAA<br>CTTCGGCGCGACGGCCGACGCGGGCGACAAGCACCCAGCAGCC<br>CATCGCCGCCATGAGCTCGTCGCCCTACCACGTGTCCGACCAC<br>AAGGCGGCCATCACCGTCGGCGTCATCATGGGCGTCTTCTCA<br>TCTGCTGGGTGCCCTT |
| <i>phf2011</i> | TTGACGAGAACCTGCCTTATGGATGGAAGAAATGTGCAGTTCA<br>AAgAAAAGGAGGGTCTTCTATTGGAAAGTGGGATGTGTTCTAC<br>ATCAGTCCACAGGGCAGAAAATTTGATCACGCAATGAACTG<br>ATGTCTCACCTTAAAAAAGCTGATCAGGTGGTAAGAAAAAAC<br>AAATGTGATTATCCATTACATCAATGCAAGAGAGCAGGAAAA<br>CCAATAGAAAAAGATCTCAGAGCAGCACAACTACACCTCAA<br>AGACACATGCATTCTGTTGGTTTTAGTAATGATGCACAAAATC<br>AAGGCTTTGGATCTGAACCCAGAAACGCATTAAGACTTTACT<br>TCCAAAATCCGGGCTCAGGAAGAAGATAACGAAACAACACA<br>AATGTGTATGACTAAAGGAAAATGTGAAACCAAAGACTGCC<br>CTCAGCCACTCTGGGCATGCAATCACAGCTGGAATGTCAGAAG<br>TCTtCCGATCACCAA                                                                                                                                                  |
| <i>ac2</i>     | GGATGGCACATCACAGAAACATGTGCACTTGTGTTGCTGATGA<br>GTTTTCTTTTCCTGCGAATGCATTTTCAACTCAAACCTTCTGATT<br>GGTTGCCTAATCACTGGTGCATATGGCTGTGTCATCTGGATAC<br>TGCAGCCATCCGTATTCCAAAACAGTGAGACATCAAATCCAAA<br>TTTAAAACCACAGGTGGCTCACATCATGTCCATTGTGTTCTTAA<br>CATTCTCACTTCACCTGATAGGCAGGCAGTCAGAGTATATGAA<br>TCGTTTGGATTATCTTTGGAAACGTCAGCTTTCTGAAGAGCAG<br>GATCTATCAGCYACAACCTCGTCTAGTGAACAAGATGCTCCTGG<br>AGAACATCTTGCCATCTCATGTTGCTGAACTCTACCTCAATATA<br>GAAAGAACTTCTGATGAGCTGTATCACGAAGAATATGACTCAG<br>TAGCTGTCTTGTGTTGCTACAGTTACTGATTATACTCTTTTTGAC<br>TTTGATTATCCTGAAAACAGCAATGAGCTAGTTAGTCTCCGAG<br>TACTCAATGAAATCATATGTGACTTTGATAAGCTACTGTTTGA                                                     |

ACCAAATTTCTTACGTGTGGAGAAAATARAAGTTGTTGGATGG  
ACTTATATGGCTGCTTGTGGCTTGGATCCAGGACGCAGGGACT  
CAACARCTTCCATTAGCAGGCRATCATTCCCCAACATGTAGT  
GTATGTGCTTGCTCGTTTTGCTACAAGGATGATGGCTGCACTA  
GAAAAAATAAATGAAGAAGGTCAACAATCATACAGGTTGAGA  
GTGGGTATTTACATGGCCCAATTACTGCTGGAGTAATTGGAG  
CACAAAAGCCTCTATATGACATCTGGGGTGATGCTGTAAATA

*La*

GAATGAGGAACGGCGGAAGGAGCTAATGACTCGCACTCTTTA  
CTTAAAAGGTTTTCTGTACAGGACACTACTCTGGACAACTG  
TTAGATTTTTTTGCACAGCATTCAACAGTTGAAAATGTTCAAG  
GCGTTCGTACAAGGACAAAGCAACAAATAAATTTGTGTTCAAG  
GGATCTGTGTTTGCCACTTTTCCAACCAAAGAAAAGGCTGAAG  
AATTTCTGGGCAAGGAAATAAAATATGAAGGAAATGATCTTAT  
TAAGAAATGGCAATCTGTGTATGTAGAAGAAAAGAAAAAGA  
ACGGGAAGAAGCCAAGGCAAAGAGGAGAGGTGGTGCACAAA  
ATGAGGCTGATAAAAAGGCTCTTCCAAGGGTGCAATTTTGCA  
TCTGAAAGGCCTTACTAGTGATATTTCAAGGGAACAAATCAGT  
GAGAACTTTCAGAATATGAGGCAGACATAGCTTACATTTCTT  
ATGACAAAGGGGATGAAGAAGGTTGGATCAGACTCCAAGGCG  
AAAATTCTACAAAAGCTGTCCTTGAAAAAATTGGGGAGACGA  
CTTTAGAAATTGGTAATGTAAAAATTGAAGTGAGAGCACTGGA  
AGGTGAAGAGGAGGAACAATTTCTCAAGAAAATATGGAGGA  
CATTCAAAAAGGAGATTCCACTACAATCAAACAAACGTGG  
TCGTAGAGGTGGTGGCAGAGGTGGATTTCAGAGGTGACAGGAA  
AAGAAAACAGGCTTCAGCGGAATCA

---

**Supplementary Table 5. Primer sequences for quantitative PCR.**

| Genes          | Forward primer (5'-3')                     | Reverse primer (5'-3')         |
|----------------|--------------------------------------------|--------------------------------|
| <i>Dop1</i>    | GCGCATCGGCAACCTCTTC                        | GATCCAGGTGTCGCAGAAC            |
| <i>ac2</i>     | GGATGGCACATCACAGAAAC                       | TGCACCAGTGATTAGGCAAC           |
| <i>La</i>      | GAATGAGGAACGGCGGAAG                        | TGTCCTTATACGAACGCATCTG         |
| <i>pfas</i>    | CACCGTTGCTTGCTTCTACTA                      | ACTGCTGGTTACTCTGTTGGA          |
| <i>gart</i>    | GTGATTCTTCTCTGCTTGACT                      | TGACTTGCCATTACAACCTCAA         |
| <i>purh</i>    | GCCTATCAGAGTGGAGTTGAG                      | ATGGTGGAACAGACGCAAGT           |
| <i>amd1</i>    | TTCTAAGGTCTGGTCTGGTTCC                     | GCAGTTGAGTCCACATAAGGC          |
| <i>sirt3</i>   | ATTCCAAGGTCAACTACGCATT                     | GGCACGGTACTGTCTCCTAA           |
| <i>fgfr3</i>   | CACCTCCATCTGCGTCTACC                       | TGAAGTTGCCGTCACCATCT           |
| <i>unc-89</i>  | AGGTGAGACGCTATTCATTCCA                     | CAGTGCCTCCAACAGTTCTTC          |
| <i>tgmh</i>    | GCGTCCAGCGTCTACTACAC                       | TACTCGTCCACCGTCACCTT           |
| <i>phf2011</i> | ACAAGGAGCCATTGAGAGTGA                      | AGGTGAGACATCAGTTCATTGC         |
| <i>RP-49</i>   | CGCTACAAGAAGCTTAAGAGG<br>TCAT              | CCTACGGCGCACTCTGTTG            |
| miR-9a         | ACACTCCAGCTGGGTTCTTTGG<br>TTATCTAGCTGTATG  | CTCAACTGGTGTCGTGGAGTCG<br>GCAA |
| Pre-miR-9<br>a | AGTGCATGTGACTGTCATAAAG                     | CTCAACTGGTGTCGTGGAGTCG<br>GCAA |
| Pri-miR-9<br>a | GAGCGTCTTCATCCCATCCA                       | CAACTCCGACACTCCATTAGC          |
| U6             | ACACTCCAGCTGGGTCAAAT<br>CGTGAAGCG          | CTCAACTGGTGTCGTGGAGTCG<br>GCAA |
| 18S            | ATGCAAACAGAGTCCCGACCA<br>GA                | GCGCAGAACCTACCATCGACAG         |
| miR-981        | ACACTCCAGCTGGGTTTCGTTG<br>TCGACGAAACCTGCA  | CTCAACTGGTGTCGTGGAGTCG<br>GCAA |
| miR-276        | ACACTCCAGCTGGGTTAGGAA<br>CTTCATACCGTGCTCT  | CTCAACTGGTGTCGTGGAGTCG<br>GCAA |
| miR-210-5<br>p | ACACTCCAGCTGGGTCTTGTGC<br>GTGTGACAGCGGCTAT | CTCAACTGGTGTCGTGGAGTCG<br>GCAA |
| miR-10-5p      | ACACTCCAGCTGGGTTACCCTG                     | CTCAACTGGTGTCGTGGAGTCG         |



|                 |                                             |                                |
|-----------------|---------------------------------------------|--------------------------------|
|                 | TAGATCCGAATTTGT                             | GCAA                           |
| miR-133         | ACACTCCAGCTGGGTTTGGTCC<br>CCTTCAACCAGCTGT   | CTCAACTGGTGTCGTGGAGTCG<br>GCAA |
| miR-263a-<br>5p | ACACTCCAGCTGGGTAATGGC<br>ACTGGAAGAATTCACGG  | CTCAACTGGTGTCGTGGAGTCG<br>GCAA |
| miR-193         | ACACTCCAGCTGGGTTACTGGC<br>CTGCTAAGTCCCAAG   | CTCAACTGGTGTCGTGGAGTCG<br>GCAA |
| miR-190         | ACACTCCAGCTGGGTAGATAT<br>GTTTGATATTCTTGGTTG | CTCAACTGGTGTCGTGGAGTCG<br>GCAA |
| miR-278-3<br>p  | ACACTCCAGCTGGGTTCGGTGG<br>GACTTTCGTCCGTTT   | CTCAACTGGTGTCGTGGAGTCG<br>GCAA |
| miR-2765        | ACACTCCAGCTGGGTTGGTAAC<br>TCCACCACCGTTGGC   | CTCAACTGGTGTCGTGGAGTCG<br>GCAA |
| miR-315-5<br>p  | ACACTCCAGCTGGGTTTTTTGAT<br>TGTTGCTCAGAAAGC  | CTCAACTGGTGTCGTGGAGTCG<br>GCAA |
| miR-8-3p        | ACACTCCAGCTGGGTTAATACT<br>GTCAGGTAACGATGT   | CTCAACTGGTGTCGTGGAGTCG<br>GCAA |
| miR-1           | ACACTCCAGCTGGGTTGGAAT<br>GTAAAGAAGTATGGAG   | CTCAACTGGTGTCGTGGAGTCG<br>GCAA |
| bantam-3p       | ACACTCCAGCTGGGTTGAGATC<br>ATTGTGAAAGCTGATT  | CTCAACTGGTGTCGTGGAGTCG<br>GCAA |
| miR-137         | ACACTCCAGCTGGGTTTATTGC<br>TTGAGAATACACGT    | CTCAACTGGTGTCGTGGAGTCG<br>GCAA |

---

**Supplementary Table 6. Sequences of miRNAs for quantitative PCR.**

| miRNAs      | Sequences (5'-3')        |
|-------------|--------------------------|
| miR-9a      | ucuuugguuaucaucugcuguaug |
| miR-981     | uucguugucgacgaaaccugca   |
| miR-276     | uaggaacucauaccgugcucu    |
| miR-210-5p  | cuugugcgugugacagcggcuau  |
| miR-10-5p   | uaccugugagauccgaaauugu   |
| miR-133     | uuggucuccuuaaccagcugu    |
| miR-263a-5p | aauggcacuggaagaauucacgg  |
| miR-193     | uacuggccugcuaaguccaag    |
| miR-190     | agauauguuugauauucuugguug |
| miR-278-3p  | ucggugggacuucguccguuu    |
| miR-2765    | ugguaacuccaccaccguuggc   |
| miR-315-5p  | uuuugauuguugcucagaaagc   |
| miR-8-3p    | uaauacugucagguaacgaugu   |
| miR-1       | uggaauguaaagaaguuggag    |
| bantam-3p   | ugagaucauugugaaagcugauu  |
| miR-137     | uuauugcuugagaauacacgu    |

**Supplementary Table 7. Primer sequences for miRNA overexpression.**

| miRNAs         | Forward primer (5'-3')           | Reverse primer (5'-3')           |
|----------------|----------------------------------|----------------------------------|
| miR-9a         | GGTACCCTCCAGCCTCTGT<br>TAGATTGC  | CTCGAGGTATTACCAGAGGGTG<br>CAATGT |
| miR-315<br>-5p | GGTACCGTCTCCTATTTCTT<br>TACCCTTC | CTCGAGGAATAAGGCGATGAC<br>GAGTAGG |
